# Supplementary material for: Facile Styrene Epoxidation with H2O2 over Novel Niobium Containing Cage Type Mesoporous Silicate, Nb-KIT-5
Source: Springer Nature journal article supplement (doi:10.1007/s11244-015-0372-2), 2015-03-02
Supplement: MOESM1 [file 5791762]

**Supplementary Material**

Facile Styrene Epoxidation with H2O2 over novel Niobium containing cage type mesoporous silicate, Nb-KIT-5

AnandRamanathana, RajamanickamMaheswaria,c, Bala Subramaniama,b*

aCenter for Environmentally Beneficial Catalysis, The University of Kansas, Lawrence, KS 66047, USA

bDepartment of Chemical and Petroleum Engineering, The University of Kansas, Lawrence, KS

66045, USA

cDepartment of Chemistry, Anna University, Chennai 600025, India

*Corresponding author. E-mail: bsubramaniam@ku.edu, Tel.: +1-785-864-2903; fax: +1-785-864-6051.

**Characterization techniques**

Small Angle X-ray Scattering (SAXS) of Nb-KIT-5 samples were collected on a Rigaku system with S-MAX 3000 instrument using a Bede Scientific microfocus tube source operating at 45 kV and 0.66 mA. X-ray powder diffraction (XRD) patterns in the high angle (2θ = 10-80°) were collected on a BrukerProteum Diffraction System equipped with Helios multilayer optics, an APEX II CCD detector and a BrukerMicroStarmicrofocus rotating anode x-ray source operating at 45kV and 60mA. Elemental analysis was carried out by digesting the samples in HF and H2SO4 mixture and analyzed on a Horiba JobinYvon JY 2000 (ICP-OES) instrument.Nitrogen adsorption-desorption isotherms were measured at −196 °C on a Quantachrome NOVA 2000e sorption analyzer and the data analysis was carried out with Autosorb software, NovaWin version 11.0. Prior to the physisorption experiment, the samples were heated in vacuum at 300 °C for 1h. Diffuse reflectance UV-Vis spectrawere recorded with a Perkin Elmer Lambda 850 equipped with diffuse reflectance integrating sphere, with Spectralon as the reference.

TEM images were captured using a 2 K × 2 K CCD, each mounted on a 200 kV FEI Technai F20 G2 X-Twin Field Emission STEM instrument operating at 200 kV. Samples were dispersed in ethanol, and a drop of the suspension was placed on Lacey Carbon supported on 300 mesh copper grids.A Versa 3D dual beam Scanning Electron Microscope/ Focused Ion Beam (FEI, Hillsboro, OR, USA) with a silicon drift EDX detector (Oxford Instruments, X-Max, UK) was used to measure the surface morphology, elemental composition and distribution of metals. All the SEM data reported were obtained at an acceleration voltage of 15kV, spot size 3.0 and the images were collected with an ET (Everhart Thornley) detector. The elemental mapping and energy spectrums were acquired with Aztec tools (Oxford Instruments, UK).

Temperature programmed Reduction (H2-TPR) spectra and Temperature programmed desorption of ammonia (NH3-TPD) spectra were generated with a MicromeriticsAutochem 2910 instrument equipped with a Thermal Conductivity Detector (TCD). For H2-TPR, about 30-50 mg of sample were loaded in the sample tube and heated to 550 °C in a flow of helium (30 sccm). and subsequently cooled to ambient temperature. Then 10%H2 in Ar mixture was flown through the tube, the temperature was raised to 1,050 °C at a ramp of 10 °C/min and the hydrogen consumption was monitored using the TCD detector.For NH3-TPD, about 30-50 mg of samples were heated from room temperature 550 °C to remove adsorbed water and then cooled immediately to 100 °C in a flow of helium (30 sccm). Ammonia was adsorbed at this temperature for 30 min from a He stream containing 10 vol% NH3 flowing at 10 sccm. Then the gas flow was switched to helium (30 sccm) and continued for another 30 min in order to remove any physisorbed ammonia. Following this step, the temperature was raised from 100 to 550 °C at a ramp of 10 °C/min and the desorbed ammonia was recorded.

Raman spectra were obtained on a SENTERRA (Bruker) dispersive Raman microscope with 785 nm Argon laser. FTIR spectra of adsorbed pyridine were obtained on a Tensor-27 instrument with Pike diffuse reflectance accessory.Prior to measurement, the samples were heated to 400 °C for 1h in a flow of He (20 sccm) and cooled down to room temperature. The samples are then wetted with pyridine followed by evacuation of physisorbed pyridine at 120 °C and the FTIR spectra were measured at 120 °C.

The initial epoxidation rate (*R*) estimated from 1 h of reaction was used to quantitatively assess the liquid-solid (**2) and intraparticlemass-transfer resistances (*exp*), employing established criteria (Table S1)[1, 2].

Table S1. Estimation of liquid-solid and intraparticlemass-transfer resistances with Nb-KIT-5 for styrene epoxidation.

| Mass-Transfer Step | Criterion | Estimated value |
| --- | --- | --- |
| Liquid-Solid |  | 6.7 (10-11) |
| Intraparticle |  | 1.9 (10-5) |

Concentration of styrene (*CA*) = 0.666 kmol/m3;

rate of reaction (*R*) = 1.94 × 10-6 kmol/m3/s;

liquid-solid mass-transfer coefficient (*Ks*) = 4.17 m/s [3];

catalyst loading (*w*) = 16.66 kg/m3

average particle diameter (*dp*) = 25 µm
density of particle (*ρp*) = 386 kg/m3

Molecular diffusivity (*DM*) = 1.84 × 10-5cm2/s [3]

effective diffusivity (*De*) = 3.06 × 10-6cm2/s [3];

reaction order with respect to styrene (*n*) = 1;

= parameter for evaluatingliquid‒solid mass transfer resistance

= parameter for evaluatingintraparticle mass transfer resistance


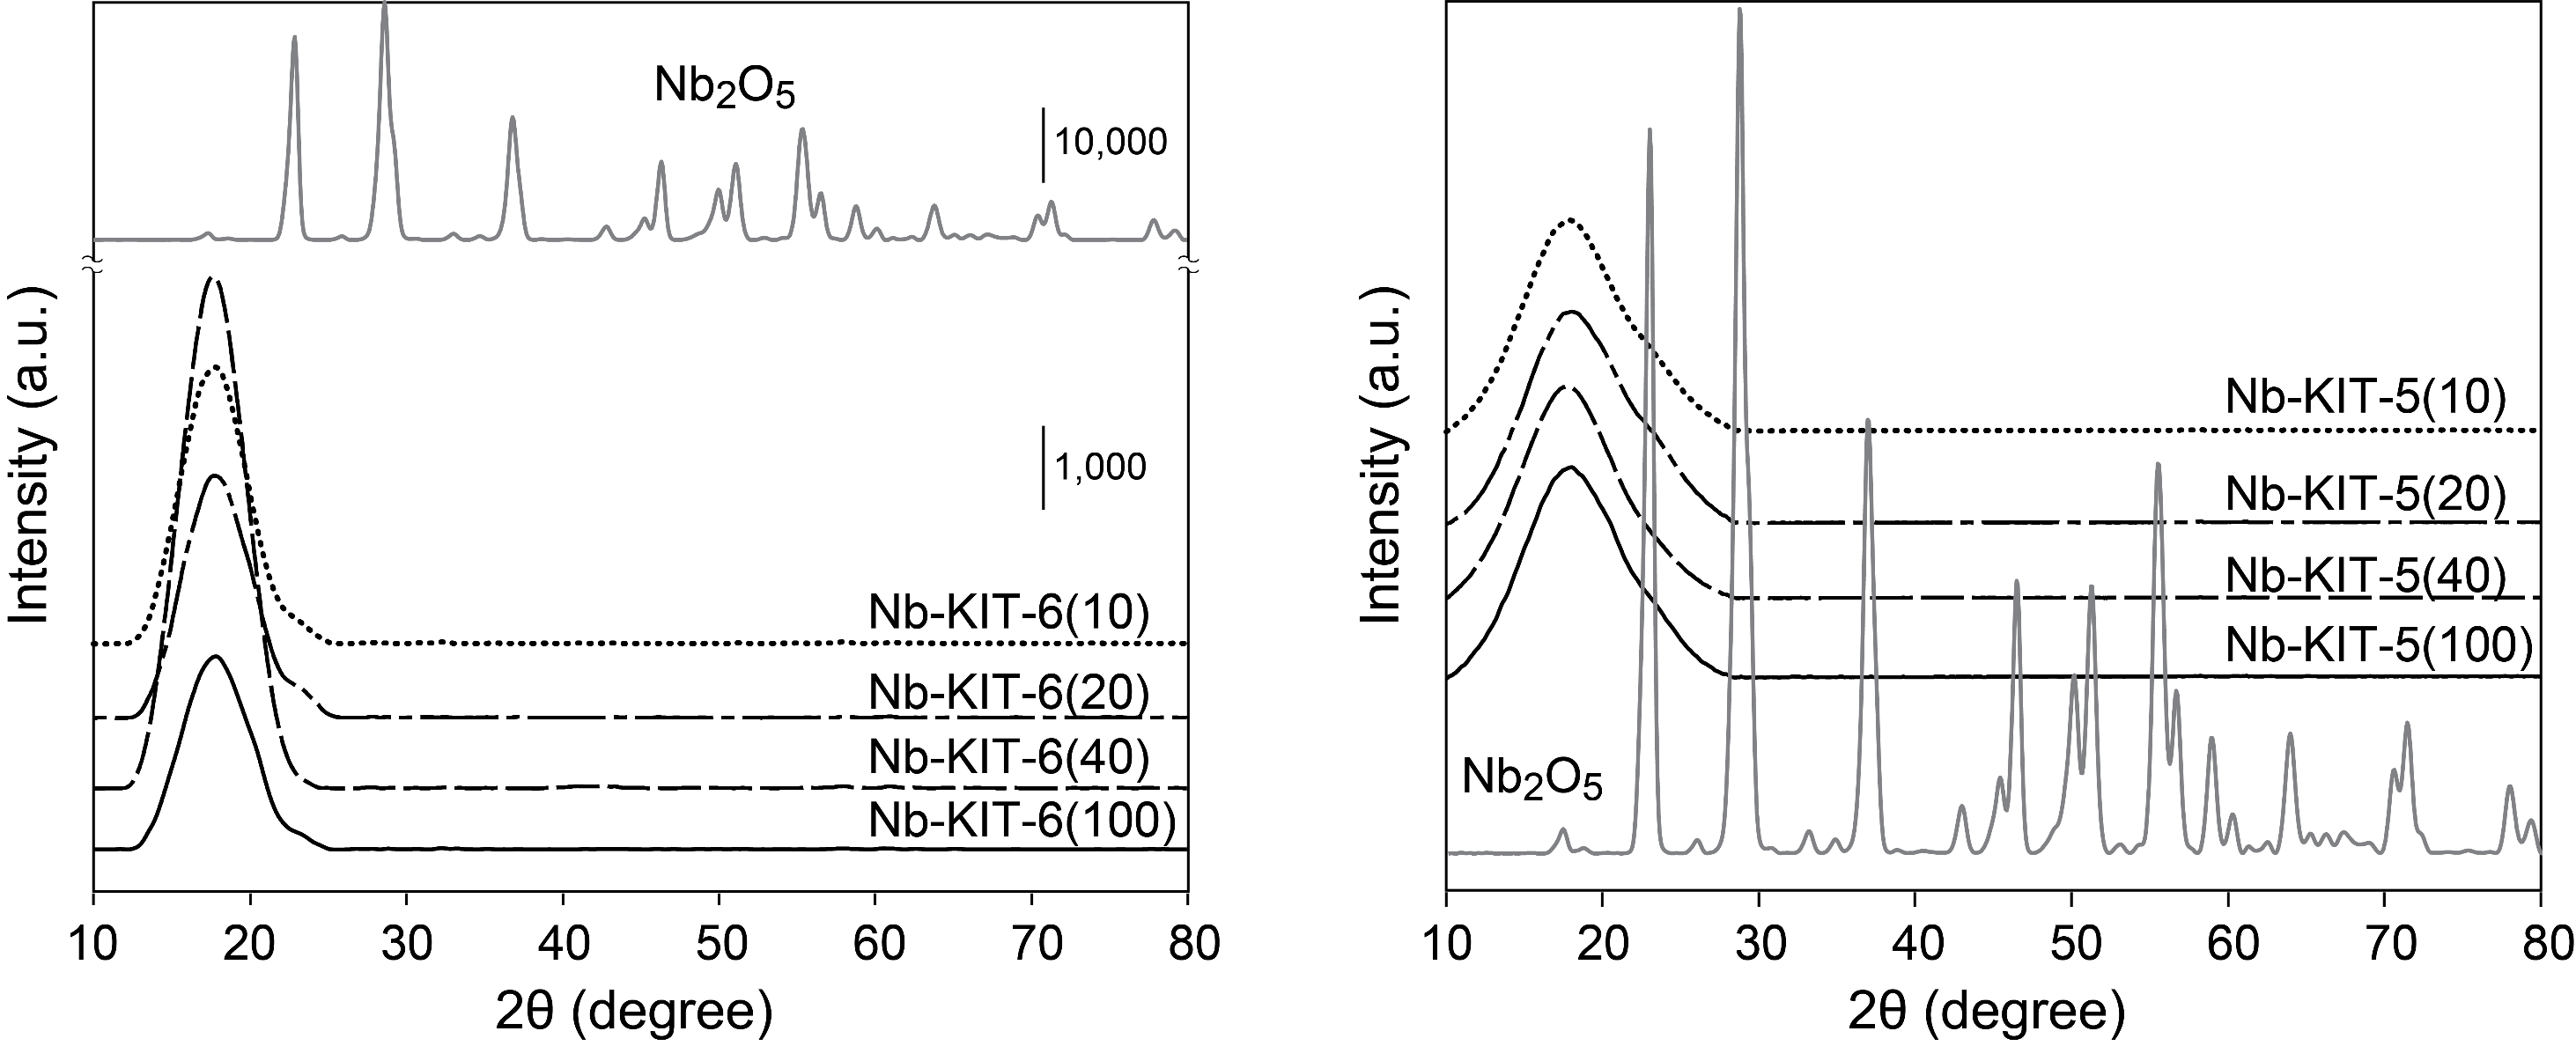


Figure S1. XRD patterns of Nb-KIT-5 samples compared that of commercial bulk Nb2O5

Figure S2. Deconvolutions of diffuse reflectance UV-Vis spectra of Nb-KIT-6(10).

Figure S3. H2-TPR of Nb-KIT-5 samples compared that of a physical admixture of 7wt% Nb2O5in Si-KIT-5.

Figure S4. Correlation of Lewis acid sites in Nb-KIT-5 with styrene and H2O2conversions.

Figure S5. Recycle study of Nb-KIT-5(10) catalyst for styrene oxidation.

References

1. Fogler HS (1986) Elements of chemical reaction engineering. Prentice-Hall

2. Yan W, Ramanathan A, Ghanta M, Subramaniam B (2014) Towards highly selective ethylene epoxidation catalysts using hydrogen peroxide and tungsten- or niobium-incorporated mesoporous silicate (KIT-6). Catal Sci Technol 4:4433–4439.

3. Wan, H, Chaudhari, R. V, Subramaniam, B. (2012) Catalytic Hydroprocessing of p-Cresol: Metal, Solvent, and Mass-Transfer Effects. Topics in Catal. 55:3 129-139.
